# Supplementary material
Source: Springer Nature journal article supplement (https://www.springermedizin.de/resource/supplementary/12961_2014_334_MOESM8_ESM.pdf/9571074)
Supplement: MOESM8 [file 9571074]

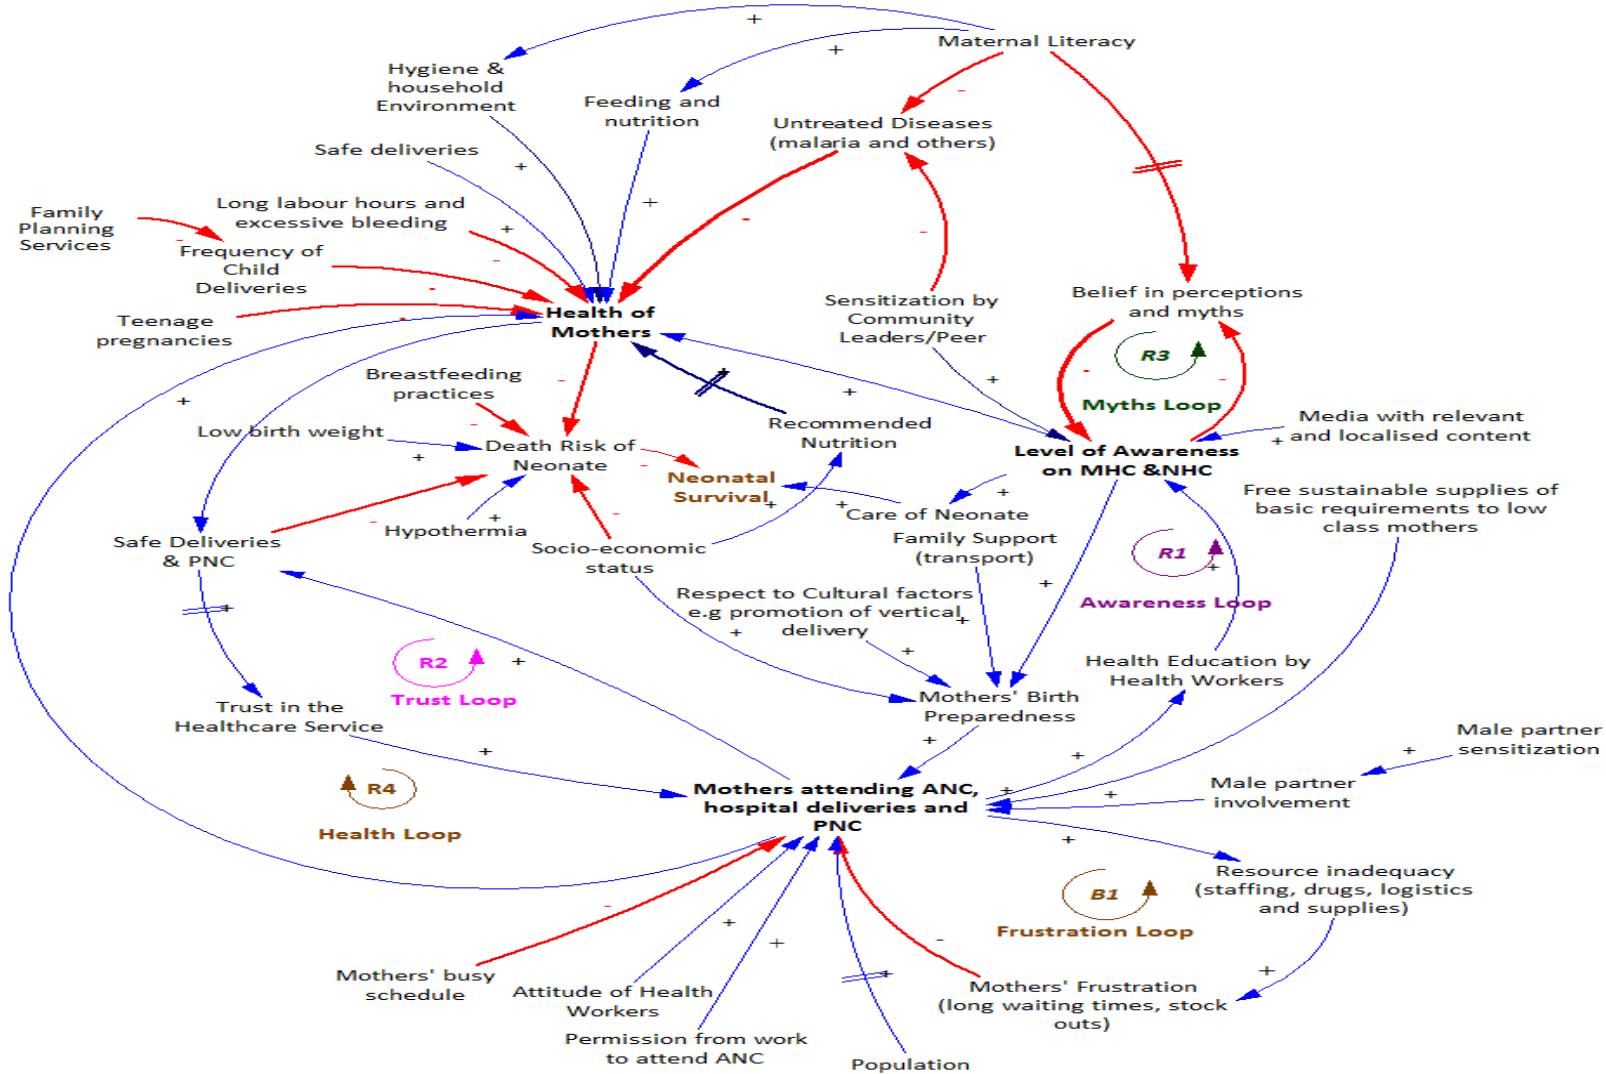

### Legend

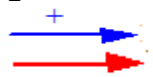

Denotes a **positive link** where a change in the influencing element is in the same direction as the influenced element  
 Denotes a **negative link** where a change in the influencing element is in the opposite direction as the influenced element

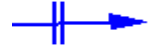

Denotes a **delay** where a change in the influencing element produces a change in the influenced element only after a delay

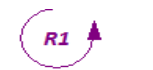

Denotes a **reinforcing loop** (R1) in counter clockwise direction.  
 Similarly R2,R3 and R4 are Reinforcing loops

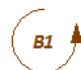

Denotes a **balancing loop** (B1) in a counter clockwise direction
